# Supplementary material
Source: MDPI journal article supplement (https://www.mdpi.com/2073-4395/12/11/2870)
Supplement: s1 [file s1]

## Supplementary figures

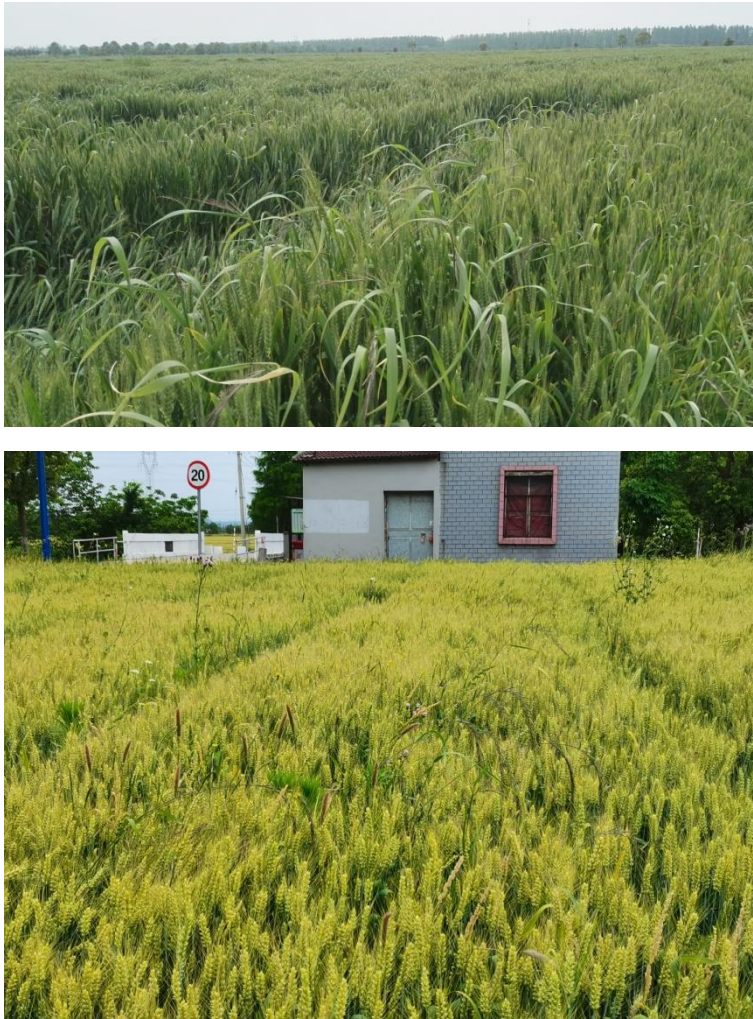

**Figure S1.** *R. kamoji* infested wheat fields: Jingzhou, 2017 (upper); Haiyan, 2022 (lower).

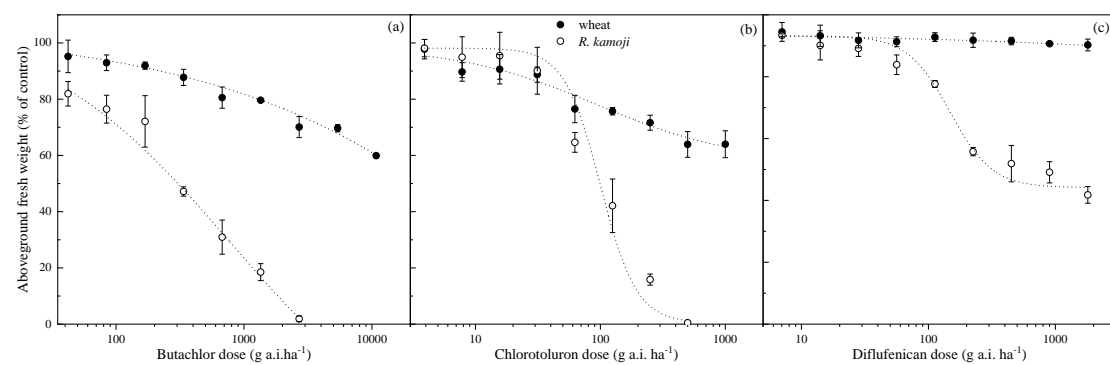

**Figure S2.** Dose response curves for the fresh weight (% of control) of wheat and ZJHZ *R. kamoji* populations treated with a range of butachlor (a), chlorotoluron (b) and diflufenican (c) doses. Each point is the mean  $\pm$  SE of the two experiments each containing four replicates.
